# Supplementary material
Source: PubMed Central journal article supplement (PMC3811873)

Supplement Figure 1

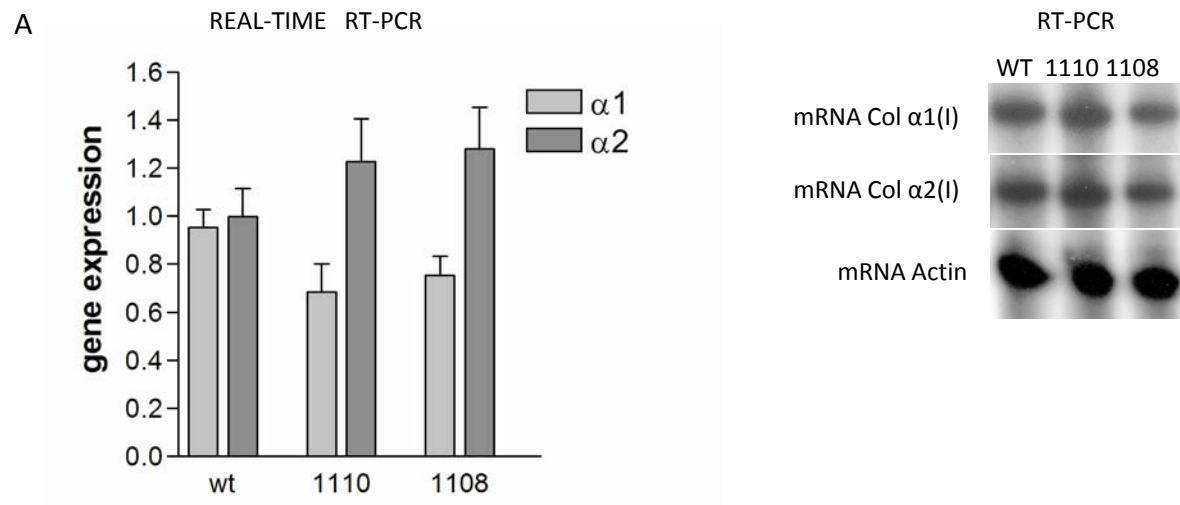

**B**

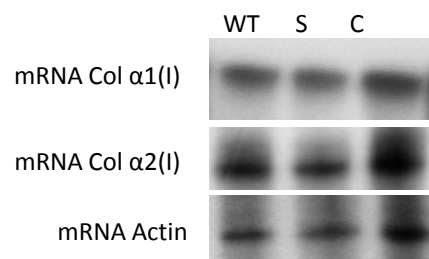

Supplement: MCB.00195-13_zmb999100142so1.pdf [file MCB.00195-13_zmb999100142so1.pdf]

Supplement Figure 2

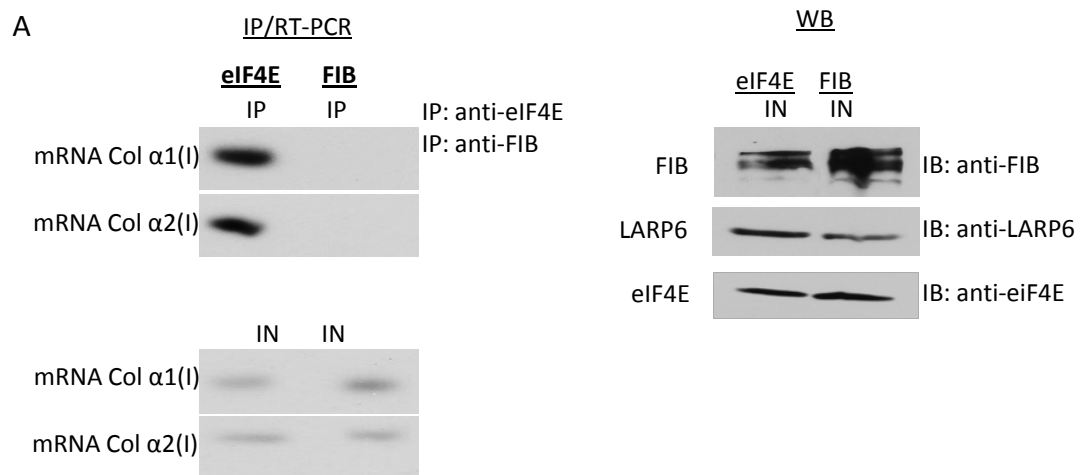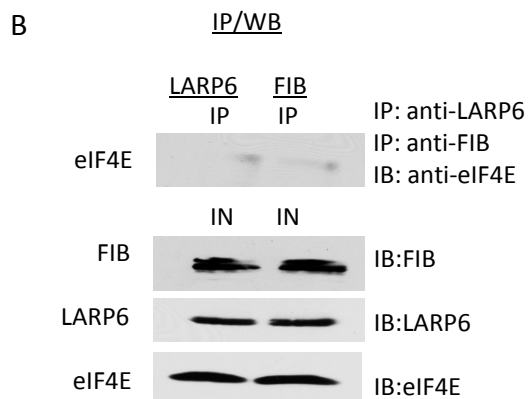

Supplement: MCB.00195-13_zmb999100142so2.pdf [file MCB.00195-13_zmb999100142so2.pdf]

# Supplement Figure 3

A

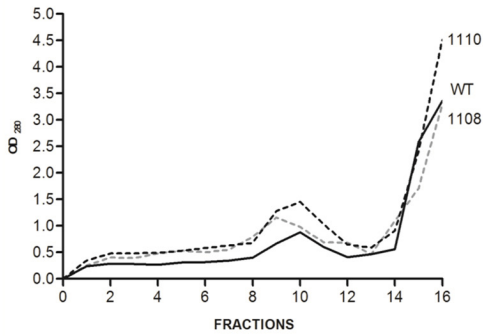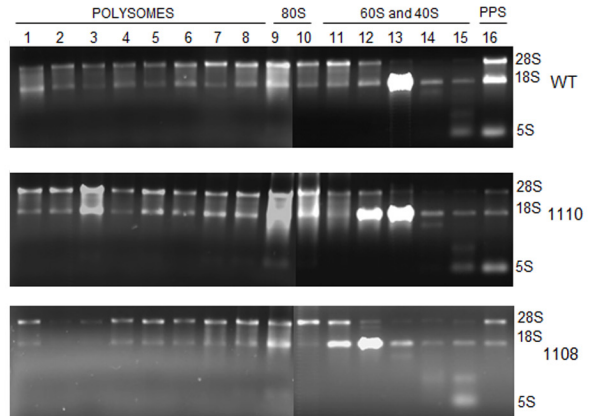

Polysomal profile of WT and Strap<sup>-/-</sup>MEFs (1110 and 1108)

B

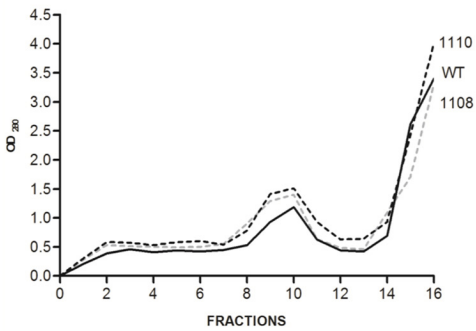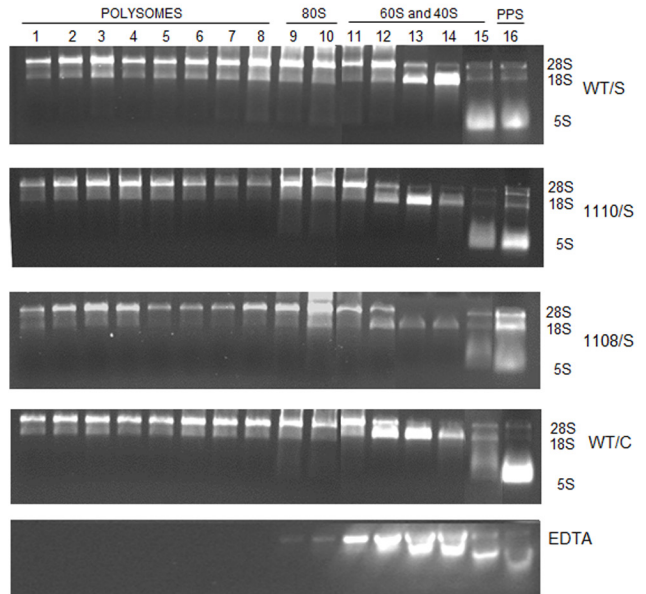

C

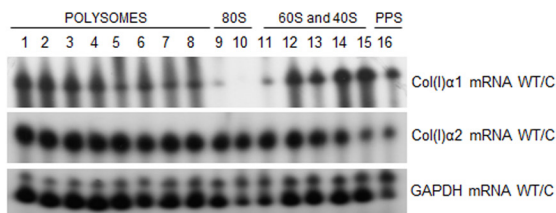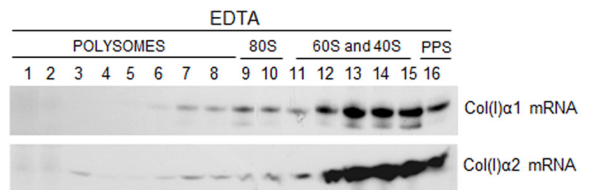

Supplement: MCB.00195-13_zmb999100142so3.pdf [file MCB.00195-13_zmb999100142so3.pdf]

# Supplement Figure 4

A

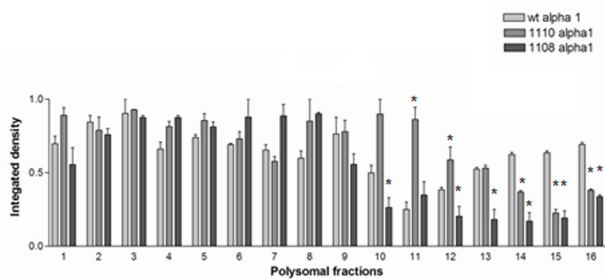

B

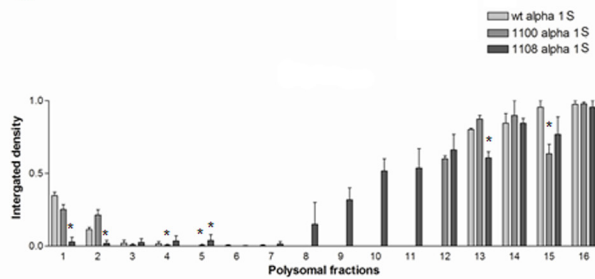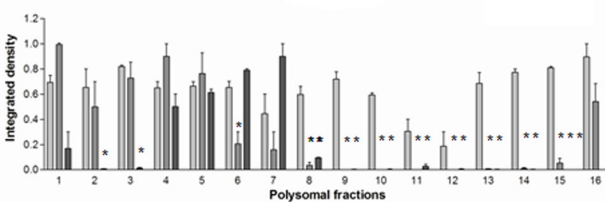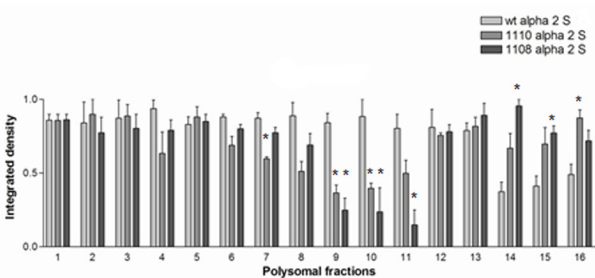

C

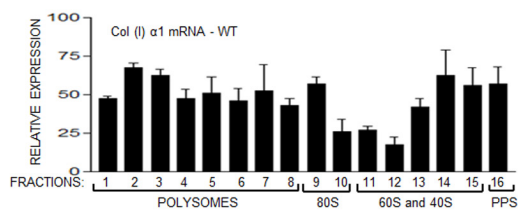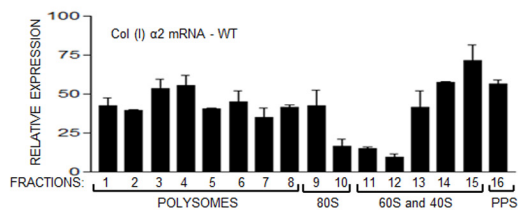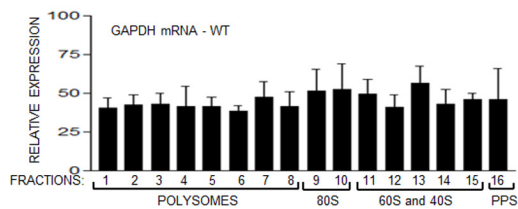

Supplement: MCB.00195-13_zmb999100142so4.pdf [file MCB.00195-13_zmb999100142so4.pdf]

Supplement Figure 5

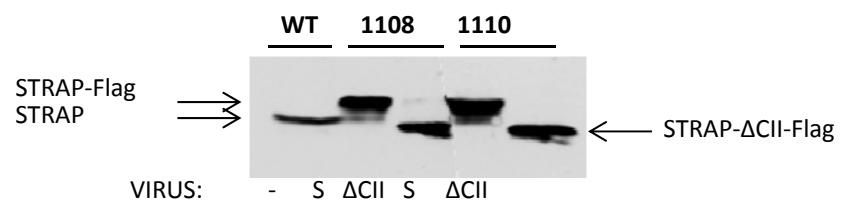

Supplement: MCB.00195-13_zmb999100142so5.pdf [file MCB.00195-13_zmb999100142so5.pdf]
